# Supplementary material for: Patients’ ability to read and understand dosing instructions of their own medicines – a cross sectional study in a hospital and community pharmacy setting
Source: Springer Nature journal article supplement (doi:10.1186/s12913-018-3252-1), 2018-06-07
Supplement: MOESM1 [file 15828594]

**Additional file 1: Patients' data collection sheet (English) in hospital and community pharmacy settings**

**“ASSESSING THE COMPLETENESS AND THE LEVEL OF COMPREHENSION OF DOSING INSTRUCTIONS PROVIDED WITH DISPENSED MEDICATION AND THE PERCEPTIONS OF PHARMACISTS ON PROVIDING DOSING INSTRUCTIONS IN A HOSPITAL AND A COMMUNITY SETTING”**

**Socio - demographic data**

1. Age: -

18-30 Years  31-50Years  51-70Years  >70Years

2. Gender: -

Male

Female

3. Education level: -

Grade 5 or below  Up to O/L

Up to A/L  Degree

Postgraduate  Other

4. Assessment of pharmacist level of counselling at your last visit  
(Score out of 10)

|   |   |   |   |   |   |   |   |   |    |
|---|---|---|---|---|---|---|---|---|----|
| 1 | 2 | 3 | 4 | 5 | 6 | 7 | 8 | 9 | 10 |
|---|---|---|---|---|---|---|---|---|----|

5. Observation:

Medication data

Prescription type - New  Refill

Prescribed drug plan for the patient

Table 01 - (Details of each medicine prescribed to the patient)

| D<br>R<br>U<br>G<br>No | Generic name | Dosage form | Strength | No of units per dose | Frequency | Duration | Before /after/ with meals | Route of administration | Special instructions |
|------------------------|--------------|-------------|----------|----------------------|-----------|----------|---------------------------|-------------------------|----------------------|
| 1                      |              |             |          |                      |           |          |                           |                         |                      |
| 2                      |              |             |          |                      |           |          |                           |                         |                      |
| 3                      |              |             |          |                      |           |          |                           |                         |                      |
| 4                      |              |             |          |                      |           |          |                           |                         |                      |
| 5                      |              |             |          |                      |           |          |                           |                         |                      |
| 6                      |              |             |          |                      |           |          |                           |                         |                      |
| 7                      |              |             |          |                      |           |          |                           |                         |                      |
| 8                      |              |             |          |                      |           |          |                           |                         |                      |
| 9                      |              |             |          |                      |           |          |                           |                         |                      |
| 10                     |              |             |          |                      |           |          |                           |                         |                      |

**Table 02 Assessing completeness of written dosing instructions given by the pharmacist. (This information will be observed and recorded by researchers)**

- A** -Generic name
- B** - Dosage form
- C** - Strength
- D** - No of units per dose
- E** - Route of administration
- F** -Frequency of administration -
- G** - Before /After/With meals
- H** - Duration
- I** -Special instructions

|         | Whether pharmacist has written necessary information?<br>N - No |   |   |                |   |   |   |   |   |   |   |   |   |   |   |   |   |   |  |  |  |  |
|---------|-----------------------------------------------------------------|---|---|----------------|---|---|---|---|---|---|---|---|---|---|---|---|---|---|--|--|--|--|
|         | Y - Yes                                                         |   |   | I - Incomplete |   |   | F |   |   | G |   |   | H |   |   | I |   |   |  |  |  |  |
|         | A                                                               | B | C | D              | E | F | G | H | I | A | B | C | D | E | F | G | H | I |  |  |  |  |
|         | Y                                                               | I | N | Y              | I | N | Y | I | N | Y | I | N | Y | I | N | Y | I | N |  |  |  |  |
|         | I                                                               | Y | I | I              | Y | I | I | Y | I | I | Y | I | I | Y | I | I | Y | I |  |  |  |  |
|         | N                                                               | I | Y | N              | I | Y | N | I | Y | N | I | Y | N | I | Y | N | I | Y |  |  |  |  |
|         | N                                                               | I | Y | N              | I | Y | N | I | Y | N | I | Y | N | I | Y | N | I | Y |  |  |  |  |
|         | I                                                               | Y | I | I              | Y | I | I | Y | I | I | Y | I | I | Y | I | I | Y | I |  |  |  |  |
|         | Y                                                               | I | N | Y              | I | N | Y | I | N | Y | I | N | Y | I | N | Y | I | N |  |  |  |  |
|         | I                                                               | Y | I | I              | Y | I | I | Y | I | I | Y | I | I | Y | I | I | Y | I |  |  |  |  |
| Drug 1. |                                                                 |   |   |                |   |   |   |   |   |   |   |   |   |   |   |   |   |   |  |  |  |  |
| Drug 2. |                                                                 |   |   |                |   |   |   |   |   |   |   |   |   |   |   |   |   |   |  |  |  |  |
| Drug 3. |                                                                 |   |   |                |   |   |   |   |   |   |   |   |   |   |   |   |   |   |  |  |  |  |
| Drug 4. |                                                                 |   |   |                |   |   |   |   |   |   |   |   |   |   |   |   |   |   |  |  |  |  |
| Drug 5. |                                                                 |   |   |                |   |   |   |   |   |   |   |   |   |   |   |   |   |   |  |  |  |  |
| Drug 6. |                                                                 |   |   |                |   |   |   |   |   |   |   |   |   |   |   |   |   |   |  |  |  |  |
| Drug 7. |                                                                 |   |   |                |   |   |   |   |   |   |   |   |   |   |   |   |   |   |  |  |  |  |
| Drug 8. |                                                                 |   |   |                |   |   |   |   |   |   |   |   |   |   |   |   |   |   |  |  |  |  |
| Drug 9. |                                                                 |   |   |                |   |   |   |   |   |   |   |   |   |   |   |   |   |   |  |  |  |  |
| Drug 10 |                                                                 |   |   |                |   |   |   |   |   |   |   |   |   |   |   |   |   |   |  |  |  |  |

Y-Yes; I-Incomplete; N-No

**Table 03 - Assessing the readability of the dosing instructions by patient.**

**1) Can you read following instructions on the label provided by the pharmacist?**

- |          |                        |          |                                |
|----------|------------------------|----------|--------------------------------|
| <b>A</b> | -Generic name          | <b>E</b> | - Route of administration      |
| <b>B</b> | - Dosage form          | <b>F</b> | -Frequency of administration - |
| <b>C</b> | - Strength             | <b>G</b> | - Before /After/With meals     |
| <b>D</b> | - No of units per dose | <b>H</b> | - Duration                     |
|          |                        | <b>I</b> | -Special instructions          |

| Drug    | Patient readability |   |   |   |   |   |   |   |   | Total score* |
|---------|---------------------|---|---|---|---|---|---|---|---|--------------|
|         | A                   | B | C | D | E | F | G | H | I |              |
| Drug 1  |                     |   |   |   |   |   |   |   |   |              |
| Drug 2  |                     |   |   |   |   |   |   |   |   |              |
| Drug 3  |                     |   |   |   |   |   |   |   |   |              |
| Drug 4  |                     |   |   |   |   |   |   |   |   |              |
| Drug 5  |                     |   |   |   |   |   |   |   |   |              |
| Drug 6  |                     |   |   |   |   |   |   |   |   |              |
| Drug 7  |                     |   |   |   |   |   |   |   |   |              |
| Drug 8  |                     |   |   |   |   |   |   |   |   |              |
| Drug 9  |                     |   |   |   |   |   |   |   |   |              |
| Drug 10 |                     |   |   |   |   |   |   |   |   |              |

\*Each correct answer will be taken as 1 point, incomplete or wrong answer will be taken as 0 point

**. Table 04 - Assessing the patient comprehension of the dosing instructions.**

[Researcher will ask patient to interpret all dosing instructions for each drug]

**02. pecific questions asked;**

- i. Do you know the name of this drug?
- ii. Do you know the form of this drug?
- iii. How much of the drug is there in each drug unit?
- iv. How many units are you going to administer at one time?
- v. What route will you administer this drug from?
- vi. How many times a day will you administer this drug?
- vii. How will you administer the drugs in relation to meals? Before/after/with meals?
- viii. For how long will you be using this drug for?
- ix. Any other special instruction given by the pharmacist/or you know regarding this drug?

- |          |                        |          |                                |
|----------|------------------------|----------|--------------------------------|
| <b>A</b> | -Generic name          | <b>E</b> | - Route of administration      |
| <b>B</b> | - Dosage form          | <b>F</b> | -Frequency of administration - |
| <b>C</b> | - Strength             | <b>G</b> | - Before /After/With meals     |
| <b>D</b> | - No of units per dose | <b>H</b> | - Duration                     |
|          |                        | <b>I</b> | -Special instructions          |

| Drug    | Patient comprehension |   |   |   |   |   |   |   |   | Total score* |
|---------|-----------------------|---|---|---|---|---|---|---|---|--------------|
|         | A                     | B | C | D | E | F | G | H | I |              |
| Drug 1  |                       |   |   |   |   |   |   |   |   |              |
| Drug 2  |                       |   |   |   |   |   |   |   |   |              |
| Drug 3  |                       |   |   |   |   |   |   |   |   |              |
| Drug 4  |                       |   |   |   |   |   |   |   |   |              |
| Drug 5  |                       |   |   |   |   |   |   |   |   |              |
| Drug 6  |                       |   |   |   |   |   |   |   |   |              |
| Drug 7  |                       |   |   |   |   |   |   |   |   |              |
| Drug 8  |                       |   |   |   |   |   |   |   |   |              |
| Drug 9  |                       |   |   |   |   |   |   |   |   |              |
| Drug 10 |                       |   |   |   |   |   |   |   |   |              |

\*Each correct answer will be taken as 1 point, incomplete or wrong answer will be taken as 0 point

**3.) Did the pharmacist provide printed information during your last visit to the pharmacy? (Specify drug)**

Yes  No

[If yes] , Drug :.....  
 Drug :.....  
 Drug :.....

**4) Did you run short of the drug at your previous visit, before you complete the recommended duration?**

| <b>Drug</b> | <b>Yes</b> | <b>No</b> |
|-------------|------------|-----------|
| Drug 1      |            |           |
| Drug 2      |            |           |
| Drug 3      |            |           |
| Drug 4      |            |           |
| Drug 5      |            |           |
| Drug 6      |            |           |
| Drug 7      |            |           |
| Drug 8      |            |           |
| Drug 9      |            |           |
| Drug 10     |            |           |

**5) Did you have extra units of the drug before you visit this clinic?**

| <b>Drug</b> | <b>Yes</b> | <b>No</b> |
|-------------|------------|-----------|
| Drug 1      |            |           |
| Drug 2      |            |           |
| Drug 3      |            |           |
| Drug 4      |            |           |
| Drug 5      |            |           |
| Drug 6      |            |           |
| Drug 7      |            |           |
| Drug 8      |            |           |
| Drug 9      |            |           |
| Drug 10     |            |           |
